# Supplementary material
Source: publisher figshare collection journal article supplement (https://karger.figshare.com/ndownloader/files/38249625)
Supplement: Supplementary file 1 [file 38249625]

**
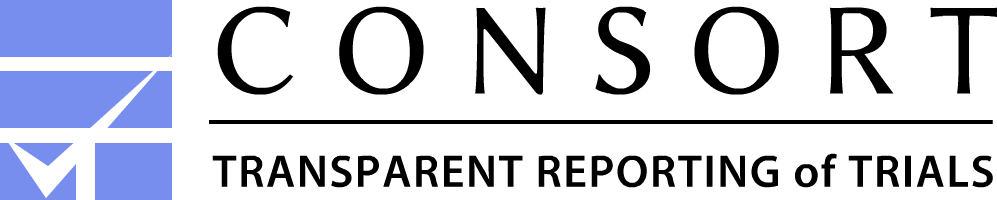
**

**CONSORT 2010 Flow Diagram**

**Allocation**

**Analysis**

**Follow-Up**

**Enrollment**

Assessed for eligibility (n=89)

Excluded (n=15)

  Not meeting inclusion criteria (n=12)

  Declined to participate (n=1)

  Other reasons (n=2)

Analysed (n=35)
 Excluded from analysis (n=0)

Lost to follow-up (n=0)

Discontinued intervention (n=0)

Allocated to intervention (n=35)

 Received allocated intervention (n=35)

 Did not receive allocated intervention (n=0)

Lost to follow-up (Death) (n=1)

Discontinued intervention (n=0)

Allocated to intervention (n=39)

 Received allocated intervention (n=39)

 Did not receive allocated intervention (n=0)

Analysed (n=39)
 Excluded from analysis (n=0)

Randomized (n=74)
